# Supplementary material for: An Anticancer Drug Cocktail of Three Kinase Inhibitors Improved Response to a Dendritic Cell–Based Cancer Vaccine
Source: Oxford University Press journal article supplement (doi:10.1158/2326-6066.cir-18-0684), 2019-07-02
Supplement: 23266066cir180684-sup-209546_2_supp_5507031_pr5prz.docx [file 23266066cir180684-sup-209546_2_supp_5507031_pr5prz.docx]

**
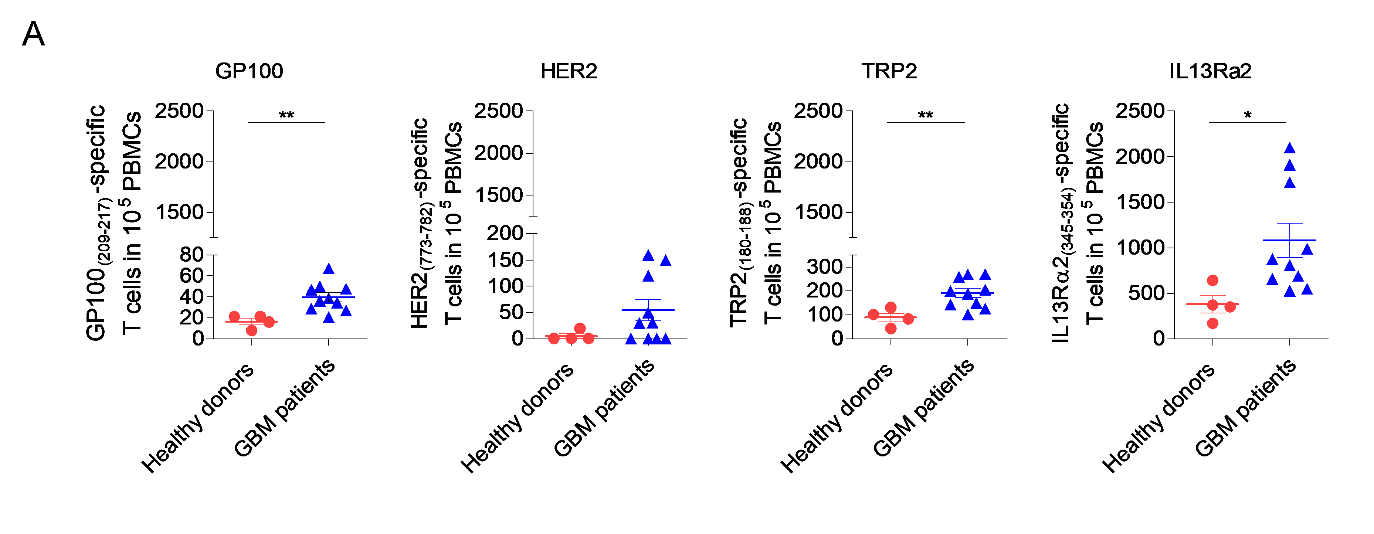
**

**Supplementary Figure 1.** **Abundance of tumor antigen-reactive CD8+ T cells in PBMCs from healthy donors and GBM patients.** PBMCs were stained by anti-CD8α and HLA-A2:Ig dimer loaded with GP100 (209-217), TRP2 (180-188), HER2 (773–782) and IL-13Rα2 (345-354), respectively. Results of tumor antigen-loaded HLA-A2:Ig dimer staining were normalized by subtracting the results of solvent-loaded HLA-A2:Ig dimer staining. Data represent mean ± SEM. *, *p* < 0.05; **, *p* < 0.01.
